# Supplementary material for: Programmable Invisible Photonic Patterns with Rapid Response Based on Two-Dimensional Colloidal Crystals
Source: MDPI journal article supplement (doi:10.3390/polym13121926), 2021-06-10
Supplement: s1 [file s1]

Article

# Programmable Invisible Photonic Patterns with Rapid Response Based on Two-Dimensional Colloidal Crystals

Naiyu Liu <sup>1</sup>, Zhikun Zheng <sup>1</sup>, Dingshan Yu <sup>1</sup>, Wei Hong <sup>1</sup>, Hailu Liu <sup>2,\*</sup> and Xudong Chen <sup>1,\*</sup>

<sup>1</sup> Key Laboratory for Polymeric Composite and Functional Materials of Ministry of Education, School of Chemistry, Sun Yat-sen University, Guangzhou 510275, China; liuny6@mail2.sysu.edu.cn (N.L.); zhengzhikun@mail.sysu.edu.cn (Z.Z.); yudings@mail.sysu.edu.cn (D.Y.); hongwei9@mail.sysu.edu.cn (W.H.)

<sup>2</sup> Guangdong Biomaterials Engineering Technology Research Center, Institute of Bioengineering, Guangdong Academy of Sciences, Guangzhou 510316, China

\* Correspondence: shirley1418@126.com (H.L.); cescxd@mail.sysu.edu.cn (X.C.)

## Supporting Informations

**Table S1.** The roughness vs. photocuring time in the masked and unmasked areas (Rq is referred to as the root-mean-square roughness).

| Area     | Roughness (nm) | Light Curing Time |      |       |       |
|----------|----------------|-------------------|------|-------|-------|
|          |                | 4Min              | 6Min | 10Min | 15Min |
| Masked   | Rq             | 41.1              | 38   | 34.7  | 24.6  |
| Unmasked | Rq             | 31.3              | 30.3 | 23.3  | 25.8  |

**Citation:** Liu, N.; Zheng, Z.; Yu, D.; Hong, W.; Liu, H.; Chen, X. Programmable Invisible Photonic Patterns with Rapid Response Based on Two-dimensional Colloidal Crystals. *Polymers* **2021**, *13*, x. <https://doi.org/10.3390/xxxxx>

Academic Editor: José Manuel Gaspar Martinho

Received: 8 April 2021

Accepted: 21 May 2021

Published: date

**Publisher's Note:** MDPI stays neutral with regard to jurisdictional claims in published maps and institutional affiliations.

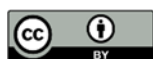

**Copyright:** © 2021 by the authors. Licensee MDPI, Basel, Switzerland. This article is an open access article distributed under the terms and conditions of the Creative Commons Attribution (CC BY) license (<http://creativecommons.org/licenses/by/4.0/>).

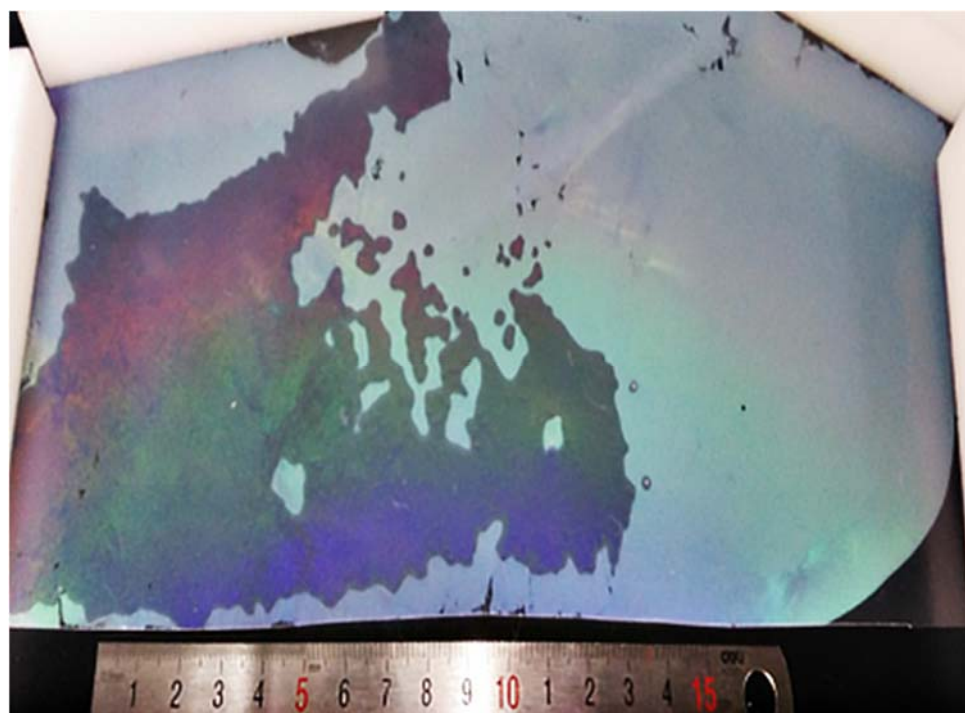

**Figure S1.** Ultra-fast fabrication of large-area 2D colloidal photonic crystals assembly at the air-water interface.

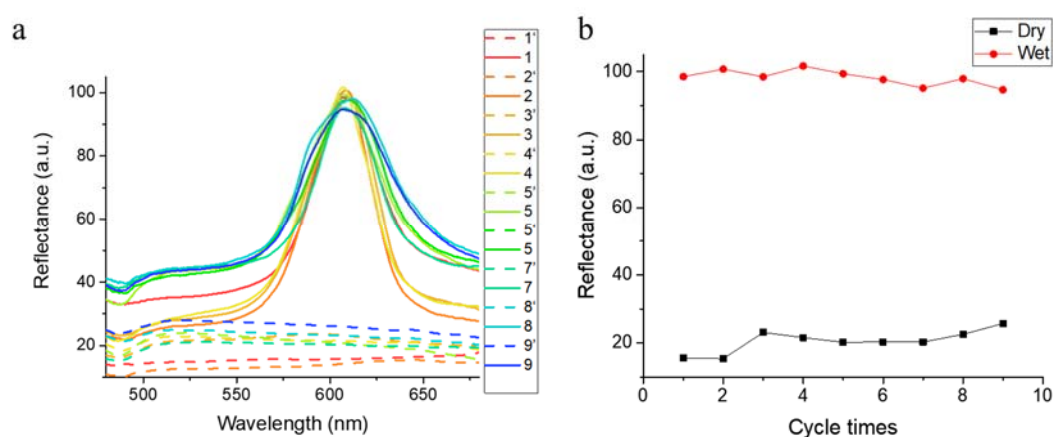

**Figure S2.** (a) Reflection spectra of the masked area of nine cycles of wetting and drying; (b) Reflectance versus cycle times for nine cycles of wetting and drying.

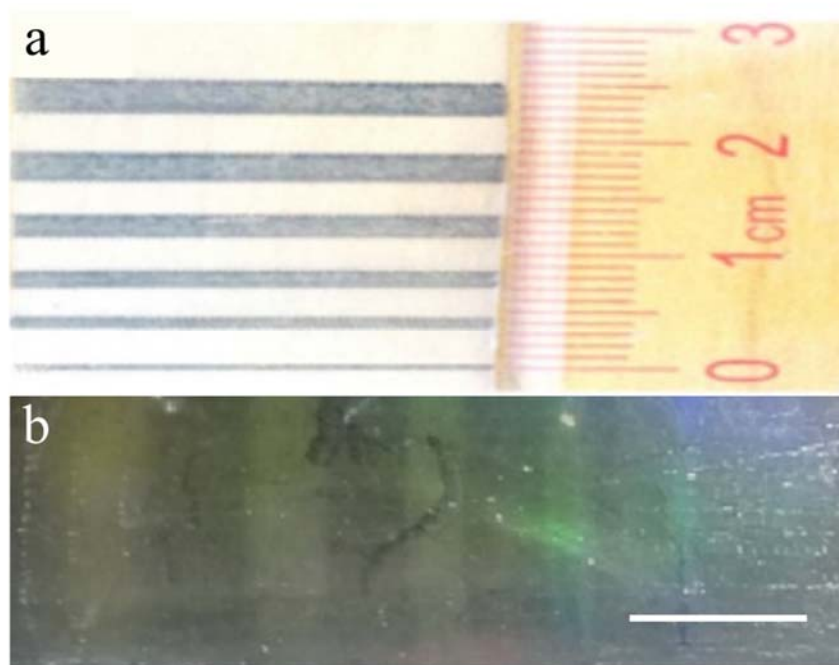

**Figure S3.** The optical precision vs. mask width in the masked area, Figure S4. AFM images of the surface topography in the masked area.

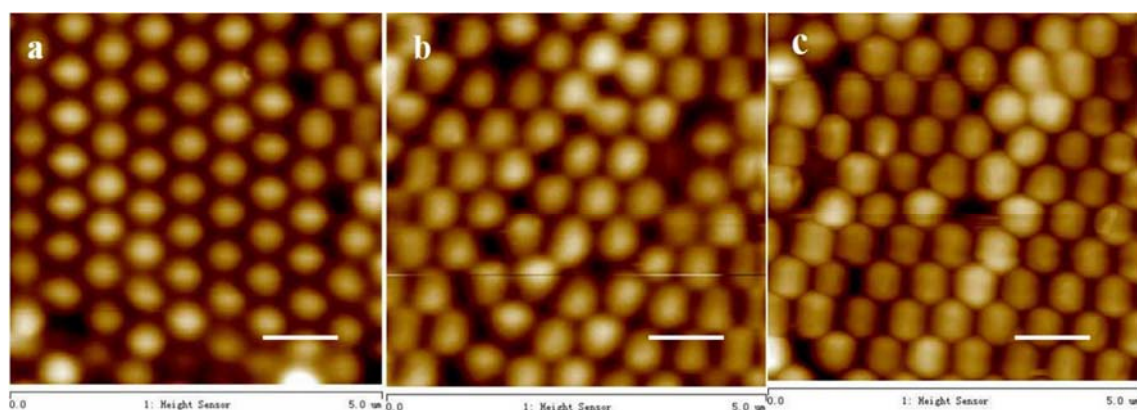

**Figure S4.** AFM images of the surface topography in the masked area. (a) in air; (b) immersed in water for 10 min; (c) immersed in water for 120 min (The scale bars are 1 μm).
